# Supplementary material for: Conserved and divergent aspects of human T-cell development and migration in humanized mice
Source: PubMed Central journal article supplement — Immunol Cell Biol. 2015 Mar 31;93(8):716–26. doi: 10.1038/icb.2015.38 (PMC4575952; doi:10.1038/icb.2015.38), 2015-03-31
Supplement: icb201538x1.pdf [file icb201538x1.pdf]

## **Supplementary video legends**

**Supplementary video 1:** Cropped representative 2-photon imaging volume of human thymocytes contacting a hematopoietic-derived human DC within the thymus of a humanized mouse. Thymocytes (orange) and DC (turquoise) correlate with cells in Figure 4a.

**Supplementary video 2:** Cropped representative 2-photon imaging volume of human thymocyte-thymocyte contacts within the thymus of a humanized mouse. Thymocytes in orange and turquoise correlate with thymocytes in Figure 4c.

**Supplementary video 3:** Cropped representative 2-photon imaging volume of human thymocyte-thymocyte contacts within the thymus of a humanized mouse. Thymocytes in orange and turquoise correlate with thymocytes in Figure 4d.

# Supplementary Figure 1

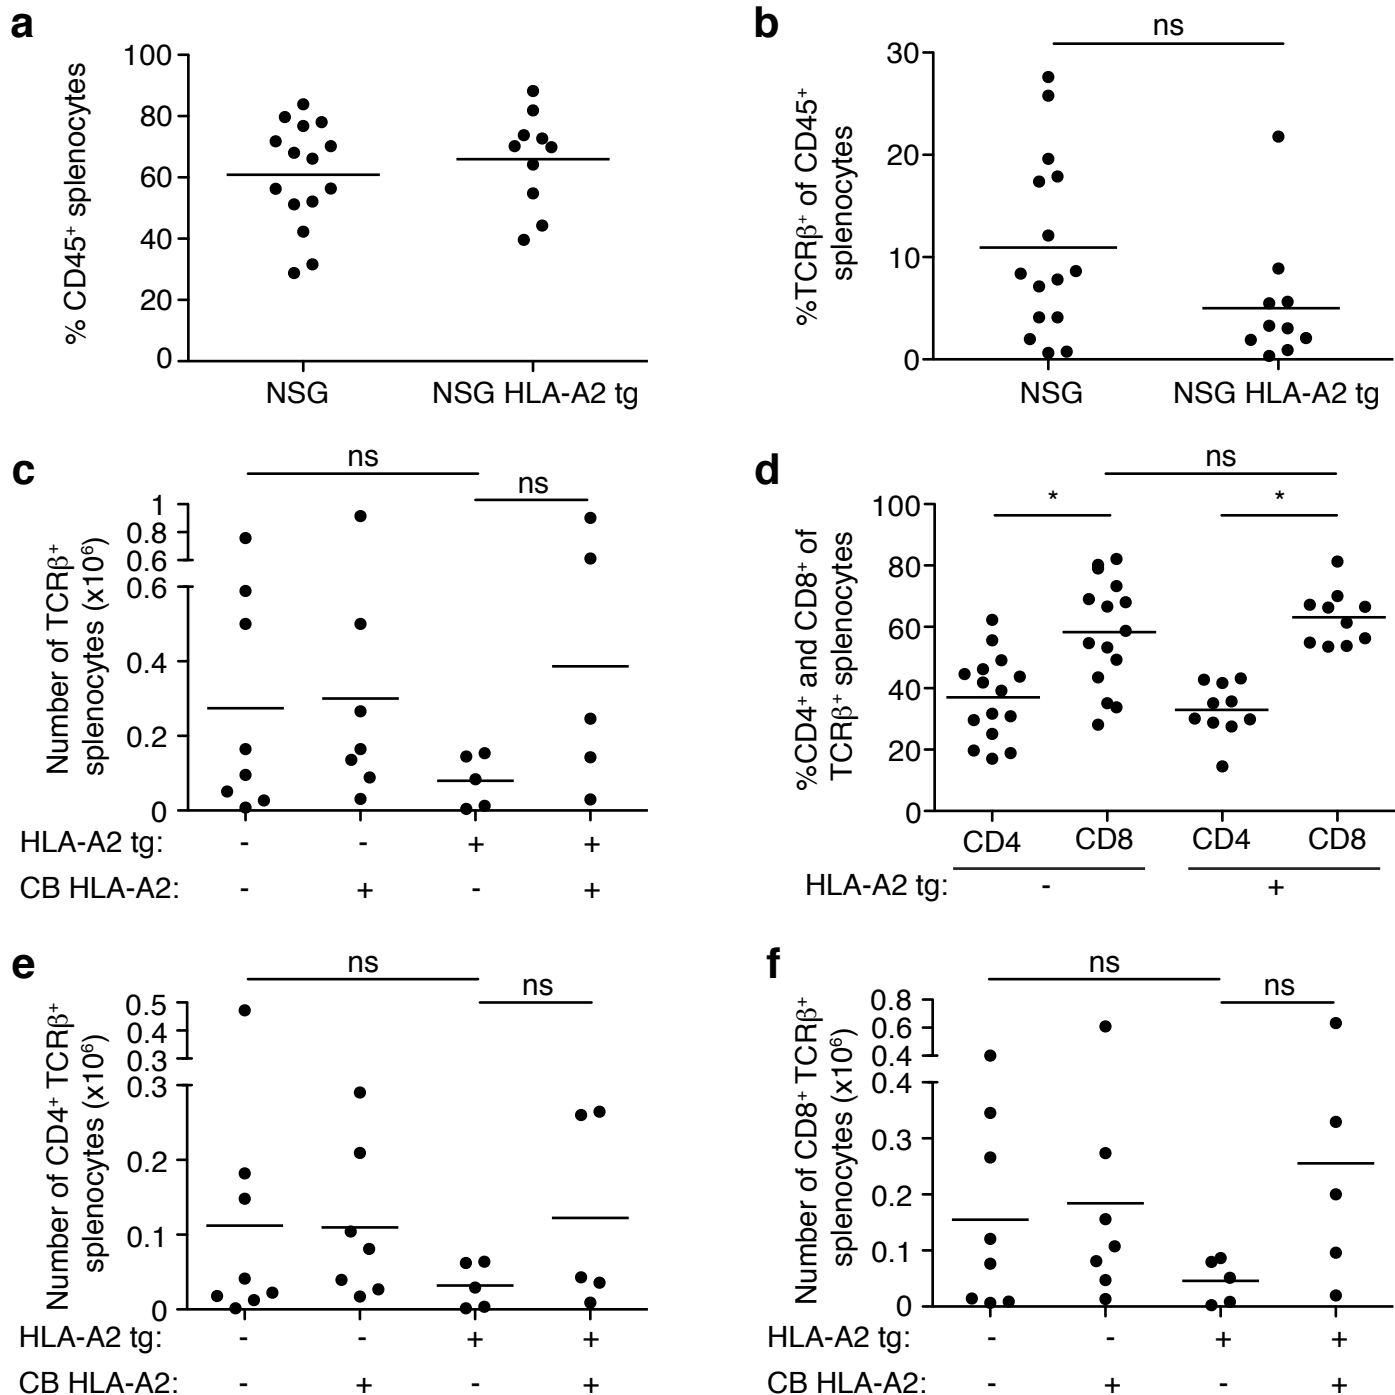

**Supplementary Figure 1.** Chimerism and T cell reconstitution in the spleen of humanized mice. **(a)** Proportion of human CD45<sup>+</sup> splenocytes in neonatal chimera NSG and NSG HLA-A2 tg mice. **(b)** Proportion of human TCRβ<sup>+</sup> splenocytes in neonatal chimera NSG and NSG HLA-A2 tg mice.  $p=0.097$  **(c)** Number of human TCRβ<sup>+</sup> splenocytes in neonatal chimera NSG and NSG HLA-A2 tg mice by HLA-A2<sup>-</sup> or HLA-A2<sup>+</sup> CB donor.  $p=0.099$  for NSG HLA-A2 tg mice reconstituted with HLA-A2<sup>-</sup> or HLA-A2<sup>+</sup> CB. **(d)** Proportion of human CD4<sup>+</sup> and CD8<sup>+</sup> TCRβ<sup>+</sup> T cells in the spleen of neonatal chimera NSG and NSG HLA-A2 tg mice. **(e)** Number of human CD4 TCRβ<sup>+</sup> splenocytes in neonatal chimera NSG and NSG HLA-A2 tg mice by HLA-A2<sup>-</sup> or HLA-A2<sup>+</sup> cord blood donor.  $p=0.164$  between NSG HLA-A2 tg mice reconstituted with HLA-A2<sup>-</sup> or HLA-A2<sup>+</sup> CB. **(f)** Number of human CD8 TCRβ<sup>+</sup> splenocytes in neonatal chimera NSG and NSG HLA-A2 tg mice by HLA-A2<sup>-</sup> or HLA-A2<sup>+</sup> CB donor.  $p=0.09$  for NSG HLA-A2 tg mice reconstituted with HLA-A2 positive or negative CB. Each dot represents one mouse. Line represents average.  $*=p<0.05$ . All statistical differences are marked with an \*.

## Supplementary Figure 2

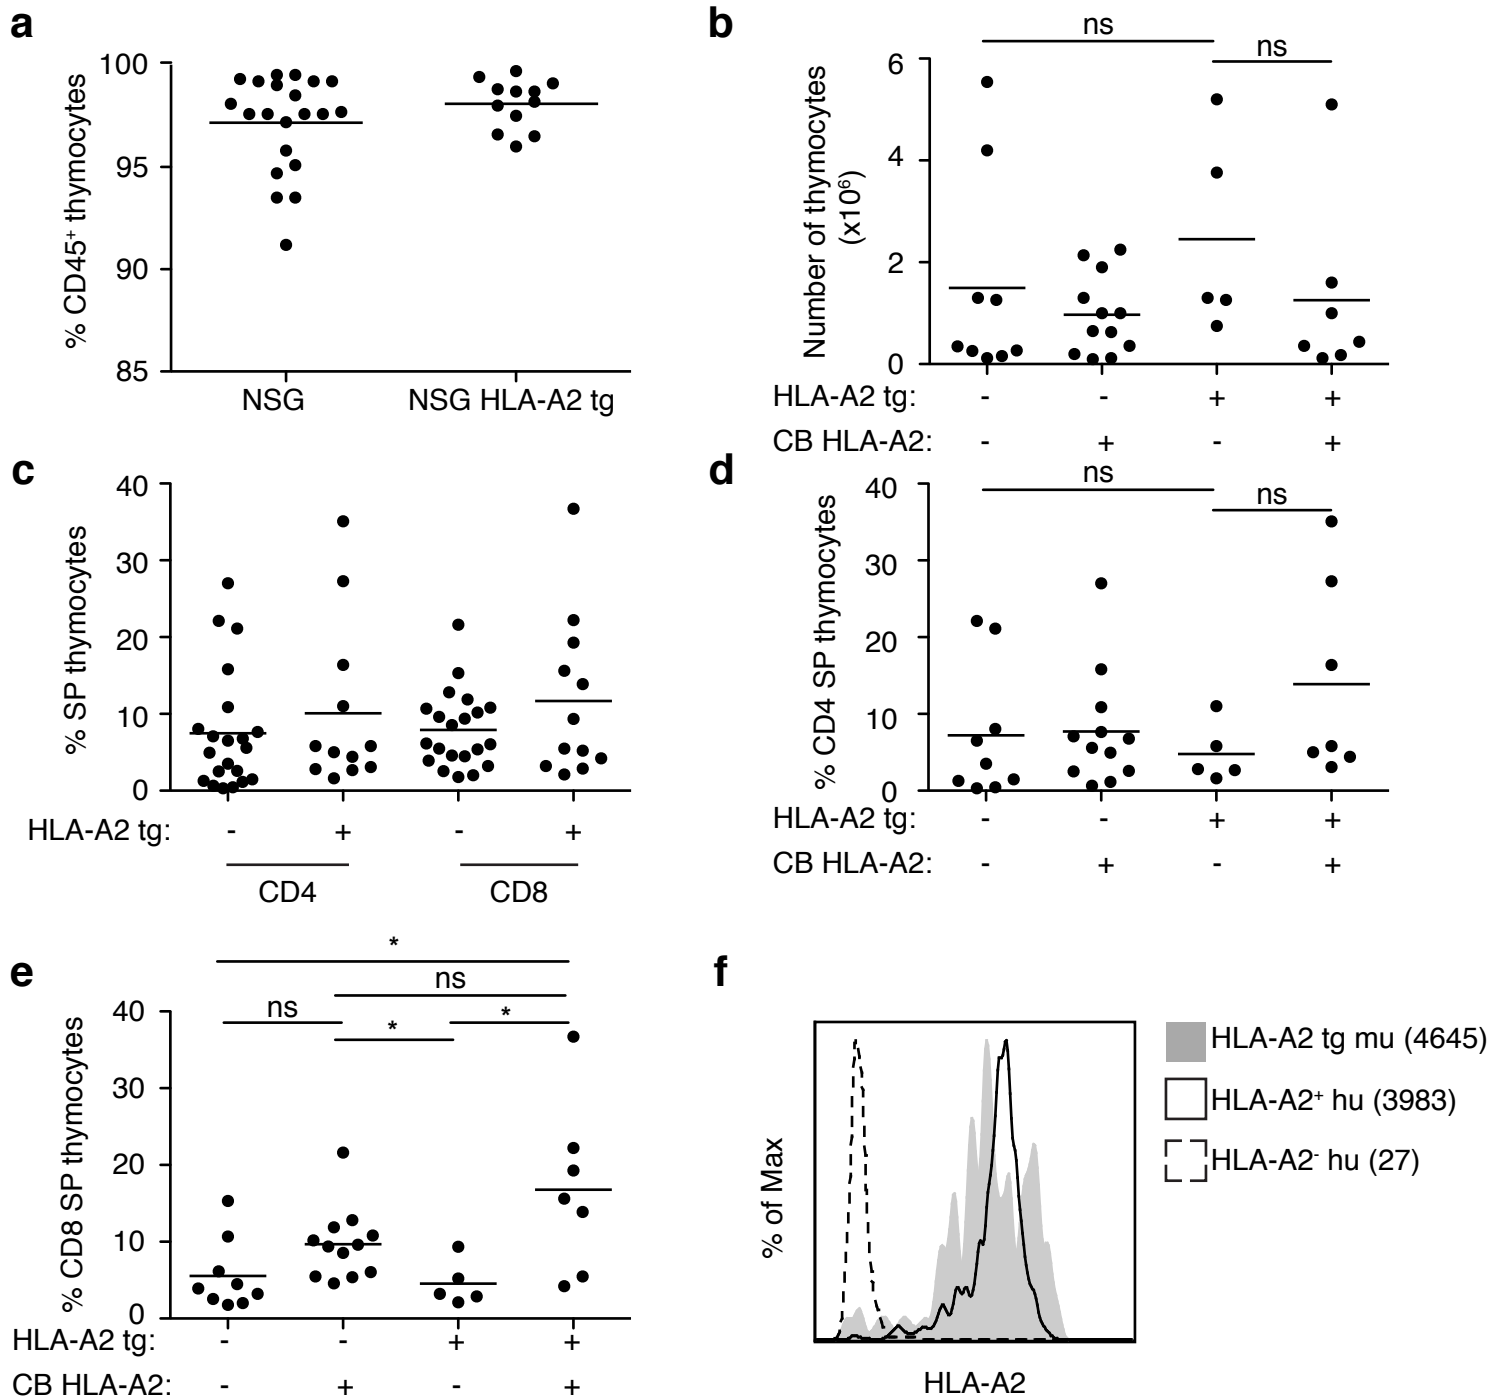

**Supplementary Figure 2.** Chimerism and reconstitution in the thymus of humanized mice. **(a)** Proportion of human CD45<sup>+</sup> thymocytes in neonatal chimera NSG and NSG HLA-A2 tg mice. **(b)** Number of human CD45<sup>+</sup> thymocytes in neonatal chimera NSG and NSG HLA-A2 tg mice by HLA-A2<sup>-</sup> or HLA-A2<sup>+</sup> CB donor. **(c)** Proportion of human CD4<sup>+</sup> and CD8<sup>+</sup> SP thymocytes in neonatal chimera NSG and NSG HLA-A2 tg mice. **(d)** Proportion of human CD4<sup>+</sup> SP thymocytes in neonatal chimera NSG and NSG HLA-A2 tg mice by HLA-A2<sup>-</sup> or HLA-A2<sup>+</sup> CB donor. **(e)** Proportion of human CD8<sup>+</sup> SP thymocytes in neonatal chimera NSG and NSG HLA-A2 tg mice by HLA-A2<sup>-</sup> or HLA-A2<sup>+</sup> CB donor.  $p=0.056$  in NSG mice reconstituted with HLA-A2<sup>-</sup> or HLA-A2<sup>+</sup> CB. **(f)** Representative histogram of HLA-A2 expression on thymic epithelial cells of reconstituted NSG HLA-A2 tg mice (HLA-A2 tg mu thy), and HLA-A2<sup>+</sup> and HLA-A2<sup>-</sup> human fetal thymic samples (HLA-A2<sup>+</sup> hu thy, HLA-A2<sup>-</sup> hu thy). The numbers in parentheses indicate the mean fluorescence intensity. Each dot represents one mouse. Line represents average. ns, not statistically significant, \* indicates  $p < 0.05$ .

### Supplementary Figure 3

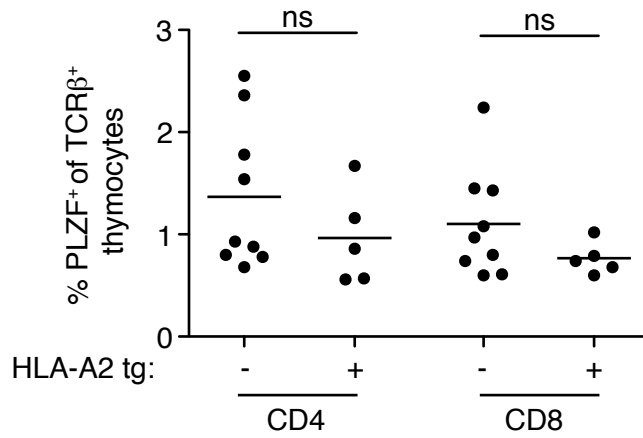

**Supplementary Figure 3.** An HLA-A2 tg does not appear to affect PLZF<sup>+</sup> T cell development in humanized mice. Proportion of PLZF<sup>+</sup> cells of CD4<sup>+</sup> and CD8<sup>+</sup> TCRβ<sup>+</sup> thymocytes in neonatal chimera NSG and NSG HLA-A2 tg humanized mice thymic samples.  $p=0.286$  for CD4<sup>+</sup>, and  $p=0.1989$  for CD8<sup>+</sup> thymocytes. Each dot represents one mouse. Line represents average. ns, not statistically significant.

## Supplementary Figure 4

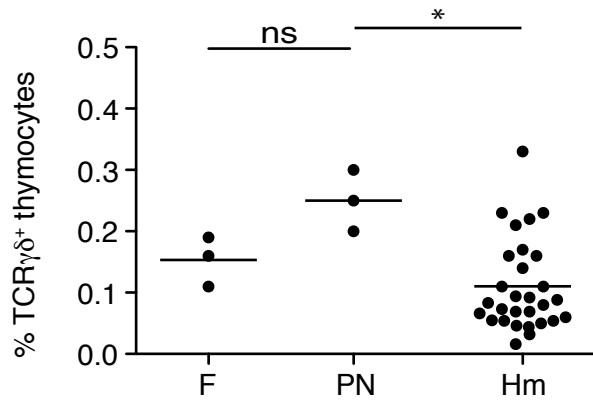

**Supplementary Figure 4.** Proportion of TCR $\gamma\delta$ <sup>+</sup> thymocytes in human fetal (F), postnatal (PN), and neonatal chimera NSG humanized mice (Hm) thymic samples. Each dot represents an individual thymus sample. Line represents average. ns, not statistically significant, \* indicates  $p < 0.05$ .

## Supplementary Figure 5

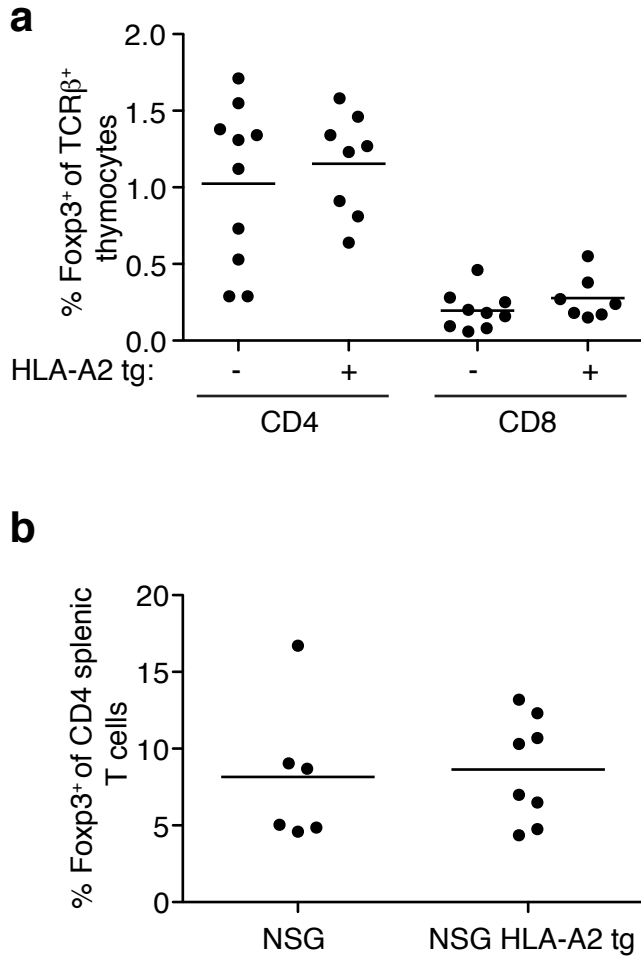

**Supplementary Figure 5.** An HLA-A2 transgene does not preferentially support Foxp3<sup>+</sup> T cell development in neonatal chimera NSG mice. **(a)** Proportion of Foxp3<sup>+</sup> cells among CD4<sup>+</sup> or CD8<sup>+</sup> SP thymocytes in neonatal chimera NSG and NSG HLA-A2 tg humanized mice. **(b)** Proportion of Foxp3<sup>+</sup> cells among CD4<sup>+</sup> TCRβ<sup>+</sup> splenocytes in neonatal chimera NSG and NSG HLA-A2 tg humanized mice. Each dot represents one mouse. Line represents average.
